# Supplementary material for: pH-sensing G protein-coupled orphan receptor GPR68 is expressed in human cartilage and correlates with degradation of extracellular matrix during OA progression
Source: PeerJ. 2023 Dec 5;11:e16553. doi: 10.7717/peerj.16553 (PMC10704986; doi:10.7717/peerj.16553)
Supplement: Supplemental Information 1 [file peerj-11-16553-s001.xlsx]

## Sheet: Fig. 2B
	RPKM value of GPR68 as analyzed from GSE114007
	Healthy Non-OA Cartilage	OA-Cartilage
	22	50
	48	99
	58	35
	18	17
	26	49
	16	247
	68	198
	107	263
		1037
		679

## Sheet: Fig. 3B
	Relative expression value of GPR68; β-actin serve as housekeeping gene
	Low grade OA	High Grade OA
	1.03226	3.57297
	4.28673	10.9844
	3.88834	6.592
	1.20648	6.45753
	1.99116	9.61216
	1.44341	4.06887
	1.55678	4.3242
	1.34213	3.12987
	1.12748	5.93554
	1.07683	4.74121

## Sheet: Fig. 4B
		Intensity value as analyzed from GSE45793
		Sham	DMM
		0.144528	5.58999
		0.509722	8.69413
		0.424762	9.91841
		0.428739	10.8144

## Sheet: Fig. 5B
		DNA methylation level in GPR68 promoter as analyzed from GSE63695
		Healthy Cartilage	OA Cartilage
		83.9	41.9
		86.7	45.6
		77.8	37.9

## Sheet: Fig. 6B
Assay	Type	Control	IL1β
ACAN	Target	1	1.0095
ADAMTD5	Target	1	0.9995
ADAMTS4	Target	1	4.1009
AGER	Target	1	1.0387
ASPM	Target	1	0.2554
ATP1A1	Target	1	1.0096
B-ACT	Selected Control	1	1.0087
B2M	Target	1	1.0195
BMP2	Target	1	2.0556
BMP4	Target	1	2.0243
BMP6	Target	1	1.9937
BMP7	Target	1	2.0069
CCL19	Target	1	2.0046
CCL2	Target	1	2.0554
CCR7	Target	1	2.0053
CILP	Target	1	0.2452
COL10A1	Target	1	2.0879
COL1A1	Target	1	0.9958
COL1A2	Target	1	1.0027
COL2A1	Target	1	0.4941
COL3A1	Target	1	0.2485
COL5A1	Target	1	2.0991
COL5A2	Target	1	1.0007
CTNNB1	Target	1	1.0167
DIO2	Target	1	2.0492
DKK1	Target	1	2.0073
ELF3	Target	1	4.1289
EPAS1	Target	1	1.0108
FGF18	Target	1	8.1576
FGF2	Target	1	0.998
FM1	Target	1	2.0526
FMOD	Target	1	2.0854
FRZB	Target	1	1.0131
GADD45B	Target	1	2.0031
GAPDH	Selected Control	1	0.9913
GDC	Target	1	0.9813
GDP11	Target	1	0.9986
GUSB	Target	1	1.0023
HIF1A	Target	1	0.9857
HMGB1	Target	1	1.009
HPRT	Target	1	1.951
HTRA1	Target	1	1.0059
IGF1	Target	1	1.9919
IHH	Target	1	522.088
IL17A	Target	1	1.0072
IL18	Target	1	1.0029
IL1A	Target	1	31.9435
IL1B	Target	1	64.6801
IL6	Target	1	4.0422
MAPK1	Target	1	1.0148
MAPK14	Target	1	0.5
MAPK3	Target	1	1.0062
MAPK8	Target	1	1.0002
MATN3	Target	1	1.006
MMP1	Target	1	7.8847
MMP13	Target	1	2.0854
MMP2	Target	1	0.9911
MMP3	Target	1	0.9971
MMP7	Target	1	3.9503
MMP9	Target	1	7.987
NFKB1	Target	1	2.0441
NFKB2	Target	1	2.0214
NOS2	Target	1	1.9985
NOTCH1	Target	1	0.9838
NTC	Target	1	1.0134
PPC	Target	1	0.5057
PTGS2	Target	1	4.0035
RUNX2	Target	1	263.736
S100B	Target	1	0.9948
SELENOH	Target	1	0.0079
SIRT1	Target	1	1.0097
SLPI	Target	1	2.0599
SMAD1	Target	1	2.065
SMAD2	Target	1	1.0002
SMAD3	Target	1	0.9971
SMAD5	Target	1	1.0075
SMAD9	Target	1	0.2468
SOX9	Target	1	0.9957
TGFBR1	Target	1	1.0057
TGFFB1	Target	1	2.0371
TIMP1	Target	1	1.002
TLR2	Target	1	1.9959
TLR4	Target	1	2.0539
TNC	Target	1	4.1032
TNF	Target	1	2.0213
TNFRSF11A	Target	1	0.4996
TNFSF11	Target	1	35067.6
WNT1	Target	1	0.9908
WNT3A	Target	1	8.1041
WNT4	Target	1	1.0023
WNT5A	Target	1	2.0878
WNT5B	Target	1	0.4923
WNT6	Target	1	1.9951
WNT7A	Target	1	2.0182
WNT8A	Target	1	0.4983
WNT9A	Target	1	2.0764

## Sheet: Fig. 7C_E
		Expression Ratio with (IL1β/control)
		GPR68	MMP13	MMP3	MMP9	ADAMTS5	ADAMTS4
	Sample1	1.86702	260.484	209.224	11.3866	315.679	110.389
	Sample2	1.98581	264.808	309.99	14.8562	345.571	161.949
	Sample3	2.60713	282.174	338.589	22.4531	451.536	465.65
